# Supplementary material
Source: PubMed Central journal article supplement (PMC4884111)
Supplement: ASN.2015040391_ASN2015040391SupplementaryData.pdf [file ASN.2015040391_ASN2015040391SupplementaryData.pdf]

**SUPPLEMENTAL APPENDIX**

**HYPOMAGNESEMIA AND THE RISK OF NEW-ONSET DIABETES MELLITUS AFTER KIDNEY TRANSPLANTATION (JASN-2015-04-0391)**

**SA-1. Prevalence of Pre-Transplant Diabetes Mellitus as a Function of Transplant Year**

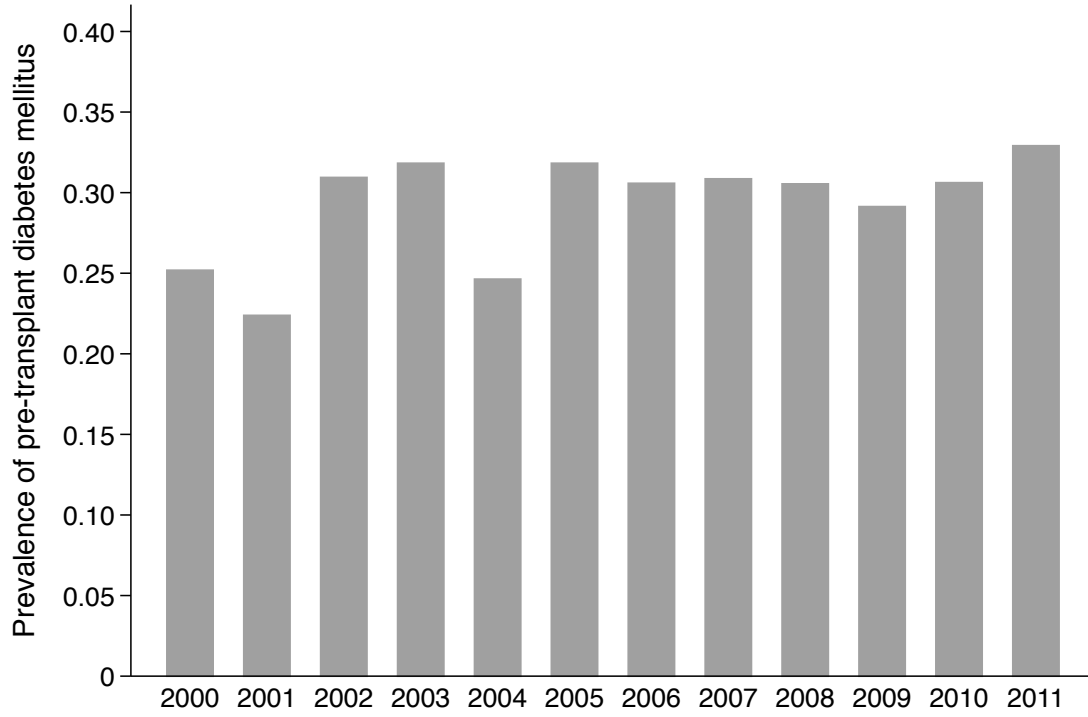

**SA-2. Subgroup Analyses by Recipient Age, Sex, Race, Body Mass Index, and Calcineurin Inhibitor Type**

| Variables             |        | Hypomagnesemia at one-month post-transplant (Yes vs. No) |                                | Time-varying hypomagnesemia (Yes vs. No) |                                | Rolling average hypomagnesemia (Yes vs. No) |                                |
|-----------------------|--------|----------------------------------------------------------|--------------------------------|------------------------------------------|--------------------------------|---------------------------------------------|--------------------------------|
|                       |        | HR (95% C.I.)                                            | <i>P</i> value for interaction | HR (95% C.I.)                            | <i>P</i> value for interaction | HR (95% C.I.)                               | <i>P</i> value for interaction |
| Recipient age (years) | < 48   | 1.14 (0.59, 2.19)                                        | 0.47                           | 1.56 (0.87, 2.77)                        | 0.64                           | 1.51 (0.83, 2.73)                           | 0.49                           |
|                       | ≥ 48   | 1.53 (0.94, 2.50)                                        |                                | 1.83 (1.26, 2.67)                        |                                | 1.93 (1.29, 2.91)                           |                                |
| Recipient sex         | Male   | 1.55 (0.92, 2.62)                                        | 0.54                           | 1.90 (1.27, 2.83)                        | 0.61                           | 2.31 (1.48, 3.59)                           | 0.09                           |
|                       | Female | 1.22 (0.68, 2.18)                                        |                                | 1.61 (0.96, 2.68)                        |                                | 1.28 (0.77, 2.15)                           |                                |
| Recipient race        | White  | 1.29 (0.77, 2.16)                                        | 0.92                           | 1.48 (1.00, 2.19)                        | 0.25                           | 1.53 (1.01, 2.32)                           | 0.26                           |
|                       | Black  | 1.38 (0.49, 3.92)                                        |                                | 3.18 (1.04, 9.72)                        |                                | 3.92 (1.13, 13.64)                          |                                |
|                       | Other  | 1.54 (0.73, 3.23)                                        |                                | 2.31 (1.24, 4.30)                        |                                | 2.15 (1.12, 4.13)                           |                                |
| Recipient BMI         | < 25   | 1.23 (0.69, 2.19)                                        | 0.53                           | 2.13 (1.25, 3.63)                        | 0.35                           | 2.43 (1.38, 4.30)                           | 0.17                           |
|                       | ≥ 25   | 1.55 (0.90, 2.68)                                        |                                | 1.61 (1.07, 2.42)                        |                                | 1.54 (1.00, 2.35)                           |                                |
| CNI type              | Tac    | 1.85 (1.19, 2.88)                                        | 0.75                           | 1.60 (0.93, 2.75)                        | 0.41                           | 2.44 (1.46, 4.08)                           | 0.09                           |
|                       | CsA    | 1.71 (1.07, 2.74)                                        |                                | 1.17 (0.65, 2.13)                        |                                | 1.38 (0.85, 2.23)                           |                                |

### SA-3. Cox Proportional Hazards Models for the Risk of New-Onset Diabetes Mellitus After Kidney Transplantation with Sequential Incorporation of Recipient, Donor, and Transplant Covariates

| Exposure variables                                 | Models                                               | Origin: one-month post-transplant |                   |                        |                   |         |
|----------------------------------------------------|------------------------------------------------------|-----------------------------------|-------------------|------------------------|-------------------|---------|
|                                                    |                                                      | Baseline magnesium                |                   | Time-varying magnesium |                   |         |
|                                                    |                                                      | HR (95% C.I.)                     | P value           | HR (95% C.I.)          | P value           |         |
| Magnesium (per 0.1 mmol/L decrease)                | 1                                                    | 1.26 (1.08, 1.47)                 | 0.003             | 1.31 (1.13, 1.51)      | < 0.001           |         |
|                                                    | 2                                                    | 1.25 (1.07, 1.45)                 | 0.005             | 1.31 (1.14, 1.51)      | < 0.001           |         |
|                                                    | 3                                                    | 1.23 (1.05, 1.44)                 | 0.01              | 1.30 (1.13, 1.50)      | < 0.001           |         |
|                                                    | 4                                                    | 1.24 (1.05, 1.46)                 | 0.01              | 1.32 (1.14, 1.52)      | < 0.001           |         |
|                                                    | 5                                                    | 1.24 (1.05, 1.46)                 | 0.01              | 1.32 (1.14, 1.52)      | < 0.001           |         |
|                                                    | Continuous magnesium                                 | 1                                 | 1.29 (1.09, 1.52) | 0.003                  | -                 | -       |
|                                                    |                                                      | 2                                 | 1.23 (1.04, 1.45) | 0.02                   | -                 | -       |
|                                                    |                                                      | 3                                 | 1.20 (1.02, 1.43) | 0.03                   | -                 | -       |
|                                                    |                                                      | 4                                 | 1.21 (1.02, 1.45) | 0.03                   | -                 | -       |
|                                                    |                                                      | 5                                 | 1.21 (1.02, 1.45) | 0.03                   | -                 | -       |
| Rolling average magnesium in the previous 3 months | 1                                                    | -                                 | -                 | 1.35 (1.14, 1.58)      | < 0.001           |         |
|                                                    | 2                                                    | -                                 | -                 | 1.33 (1.14, 1.56)      | < 0.001           |         |
|                                                    | 3                                                    | -                                 | -                 | 1.32 (1.12, 1.55)      | 0.001             |         |
|                                                    | 4                                                    | -                                 | -                 | 1.34 (1.13, 1.57)      | 0.001             |         |
|                                                    | 5                                                    | -                                 | -                 | 1.34 (1.13, 1.57)      | 0.001             |         |
| Dichotomous magnesium                              | Hypomagnesemia (Yes vs. No)                          | 1                                 | 1.64 (1.12, 2.40) | 0.01                   | 1.66 (1.22, 2.26) | 0.001   |
|                                                    |                                                      | 2                                 | 1.63 (1.11, 2.40) | 0.01                   | 1.76 (1.28, 2.41) | < 0.001 |
|                                                    |                                                      | 3                                 | 1.58 (1.07, 2.33) | 0.02                   | 1.72 (1.25, 2.37) | 0.001   |
|                                                    |                                                      | 4                                 | 1.58 (1.07, 2.34) | 0.02                   | 1.78 (1.29, 2.45) | < 0.001 |
|                                                    |                                                      | 5                                 | 1.58 (1.07, 2.34) | 0.02                   | 1.78 (1.29, 2.45) | < 0.001 |
|                                                    | Average magnesium in the first month post-transplant | 1                                 | 1.51 (1.03, 2.22) | 0.03                   | -                 | -       |
|                                                    |                                                      | 2                                 | 1.47 (1.00, 2.16) | 0.05                   | -                 | -       |
|                                                    |                                                      | 3                                 | 1.41 (0.96, 2.08) | 0.08                   | -                 | -       |
|                                                    |                                                      | 4                                 | 1.40 (0.94, 2.07) | 0.10                   | -                 | -       |
|                                                    |                                                      | 5                                 | 1.40 (0.94, 2.07) | 0.10                   | -                 | -       |
|                                                    | Rolling average magnesium in the previous 3 months   | 1                                 | -                 | -                      | 1.76 (1.26, 2.45) | 0.001   |
|                                                    |                                                      | 2                                 | -                 | -                      | 1.83 (1.30, 2.56) | < 0.001 |
|                                                    |                                                      | 3                                 | -                 | -                      | 1.78 (1.27, 2.50) | 0.001   |
|                                                    |                                                      | 4                                 | -                 | -                      | 1.83 (1.30, 2.57) | 0.001   |
|                                                    |                                                      | 5                                 | -                 | -                      | 1.82 (1.29, 2.57) | 0.001   |

Unit conversion for serum magnesium: 1 mmol/L = 2.43 mg/dL.

Model 1: Post-transplant serum magnesium (or hypomagnesemia)

Model 2: Model 1 + recipient age, recipient sex, recipient race, recipient body mass index, peak PRA, time on dialysis before transplant, recipient eGFR, pre-transplant hypomagnesemia, and cause of end-stage renal disease

Model 3: Model 2 + donor age, donor sex, donor type, donor body mass index, delayed graft function, and donor history of hypertension

Model 4: Model 3 + CNI type at one month, re-graft, and transplant era

Model 5: Model 4 without peak PRA

**SA-4. Cox Proportional Hazards Models for the Risk of New-Onset Diabetes Mellitus After Kidney Transplantation Excluding Subjects with Any Hyperglycemia Within the First Month After Kidney Transplantation**

| Exposure variables   |                                                       | Origin: at one month post-transplant |         |                                         |         |
|----------------------|-------------------------------------------------------|--------------------------------------|---------|-----------------------------------------|---------|
|                      |                                                       | Baseline magnesium<br>HR (95% C.I.)  | P Value | Time-varying magnesium<br>HR (95% C.I.) | P Value |
|                      | Magnesium (per 0.1 mmol/L decrease)                   | 1.23 (1.04, 1.45)                    | 0.01    | 1.30 (1.13, 1.51)                       | < 0.001 |
| Continuous magnesium | Average magnesium in the first month post-transplant  | 1.20 (1.01, 1.44)                    | 0.04    | -                                       | -       |
|                      | Rolling average of magnesium in the previous 3 months | -                                    | -       | 1.33 (1.12, 1.57)                       | < 0.001 |
|                      | Hypomg (Yes vs. No)                                   | 1.54 (1.04, 2.28)                    | 0.03    | 1.76 (1.27, 2.45)                       | < 0.001 |
| Binary magnesium     | Average magnesium in the first month post-transplant  | 1.38 (0.93, 2.05)                    | 0.11    | -                                       | -       |
|                      | Rolling average of magnesium in the previous 3 months | -                                    | -       | 1.89 (1.33, 2.68)                       | < 0.001 |

Unit conversion: 1 mmol/L = 2.43 mg/dL.

Models were adjusted for recipient age, sex, race, body mass index, peak PRA, time on dialysis, eGFR, pre-transplant hypomagnesemia, cause of end-stage renal disease, donor age, sex, history of hypertension, body mass index, donor type, delayed graft function, regraft, type of CNI at baseline, and transplant era.

**SA-5. Cox Proportional Hazards Models for the Risk of New-Onset Diabetes Mellitus After Transplantation (NODAT) Using (A) Glucose Readings Alone or (B) Diabetes Treatment to Diagnose NODAT**

**(A)**

| Exposure variables   |                                                      | Origin: one-month post-transplant |         |                        |         |
|----------------------|------------------------------------------------------|-----------------------------------|---------|------------------------|---------|
|                      |                                                      | Baseline magnesium                |         | Time-varying magnesium |         |
|                      |                                                      | HR (95% C.I.)                     | P value | HR (95% C.I.)          | P value |
|                      | Magnesium (per 0.1 mmol/L decrease)                  | 1.26 (1.04, 1.52)                 | 0.02    | 1.30 (1.10, 1.54)      | 0.002   |
| Continuous magnesium | Average magnesium in the first month post-transplant | 1.22 (1.00, 1.50)                 | 0.05    | -                      | -       |
|                      | Rolling average magnesium in the previous 3 months   | -                                 | -       | 1.38 (1.15, 1.67)      | 0.001   |
|                      | Hypomg (Yes vs. No)                                  | 1.68 (1.04, 2.71)                 | 0.03    | 1.99 (1.36, 2.90)      | < 0.001 |
| Binary magnesium     | Average magnesium in the first month post-transplant | 1.33 (0.84, 2.12)                 | 0.23    | -                      | -       |
|                      | Rolling average magnesium in the previous 3 months   | -                                 | -       | 2.15 (1.43, 3.24)      | < 0.001 |

Unit conversion for serum magnesium: 1 mmol/L = 2.43 mg/dL.

Models were adjusted for recipient age, sex, race, body mass index, peak PRA, time on dialysis, eGFR, pre-transplant hypomagnesemia, cause of end-stage renal disease, donor age, sex, history of hypertension, body mass index, donor type, delayed graft function, regraft, type of CNI at baseline, and transplant era.

**(B)**

| Exposure variables   |                                                      | Origin: one-month post-transplant |         |                        |         |
|----------------------|------------------------------------------------------|-----------------------------------|---------|------------------------|---------|
|                      |                                                      | Baseline magnesium                |         | Time-varying magnesium |         |
|                      |                                                      | HR (95% C.I.)                     | P value | HR (95% C.I.)          | P value |
|                      | Magnesium (per 0.1 mmol/L decrease)                  | 1.40 (0.95, 2.07)                 | 0.09    | 1.47 (1.07, 2.00)      | 0.02    |
| Continuous magnesium | Average magnesium in the first month post-transplant | 1.49 (0.95, 2.32)                 | 0.08    | -                      | -       |
|                      | Rolling average magnesium in the previous 3 months   | -                                 | -       | 1.45 (0.97, 2.16)      | 0.07    |
|                      | Hypomg (Yes vs. No)                                  | 1.50 (0.64, 3.52)                 | 0.36    | 1.45 (0.71, 2.97)      | 0.31    |
| Binary magnesium     | Average magnesium in the first month post-transplant | 2.15 (0.90, 5.10)                 | 0.08    | -                      | -       |
|                      | Rolling average magnesium in the previous 3 months   | -                                 | -       | 1.59 (0.77, 3.30)      | 0.21    |

Unit conversion for serum magnesium: 1 mmol/L = 2.43 mg/dL.

Models were adjusted for recipient age, sex, race, body mass index, peak PRA, time on dialysis, eGFR, pre-transplant hypomagnesemia, cause of end-stage renal disease, donor age, sex, history of hypertension, body mass index, donor type, delayed graft function, regraft, type of CNI at baseline, and transplant era.

**SA-6. Cox Proportional Hazards Model for the Risk of New-Onset Diabetes Mellitus by Time-Fixed (A) and Time-Dependent (B) Serum Magnesium Adjusting for Exposure to Supratherapeutic Calcineurin Inhibitor Levels in the First Month Post-Transplant**

**(A)**

| Exposure variables    |                                                      | Origin: one-month post-transplant |         |
|-----------------------|------------------------------------------------------|-----------------------------------|---------|
|                       |                                                      | Baseline magnesium                |         |
|                       |                                                      | HR (95% C.I.)                     | P value |
| Continuous magnesium  | Magnesium (per 0.1 mmol/L decrease)                  | 1.24 (1.05, 1.46)                 | 0.01    |
|                       | Average magnesium in the first month post-transplant | 1.21 (1.02, 1.45)                 | 0.03    |
| Dichotomous magnesium | Hypomagnesemia (Yes vs. No)                          | 1.58 (1.06, 2.34)                 | 0.02    |
|                       | Average magnesium in the first month post-transplant | 1.39 (0.93, 2.06)                 | 0.10    |

Unit conversion for serum magnesium: 1 mmol/L = 2.43 mg/dL.

Models were adjusted for recipient age, sex, race, body mass index, peak PRA, time on dialysis, eGFR, pre-transplant hypomagnesemia, cause of end-stage renal disease, donor age, sex, history of hypertension, body mass index, donor type, delayed graft function, regraft, type of CNI at baseline, proportion of CNI levels over therapeutic threshold within first month post-transplant, and transplant era.

**(B)**

| Exposure variables    |                                                    | Origin: one-month post-transplant |         |
|-----------------------|----------------------------------------------------|-----------------------------------|---------|
|                       |                                                    | Time-varying magnesium            |         |
|                       |                                                    | HR (95% C.I.)                     | P value |
| Continuous magnesium  | Magnesium (per 0.1 mmol/L decrease)                | 1.31 (1.14, 1.52)                 | < 0.001 |
|                       | Rolling average magnesium in the previous 3 months | 1.33 (1.13, 1.57)                 | 0.001   |
| Dichotomous magnesium | Hypomagnesemia (Yes vs. No)                        | 1.77 (1.28, 2.44)                 | 0.001   |
|                       | Rolling average magnesium in the previous 3 months | 1.82 (1.29, 2.56)                 | 0.001   |

Unit conversion for serum magnesium: 1 mmol/L = 2.43 mg/dL.

Models were adjusted for recipient age, sex, race, body mass index, peak PRA, time on dialysis, eGFR, pre-transplant hypomagnesemia, cause of end-stage renal disease, donor age, sex, history of hypertension, body mass index, donor type, delayed graft function, regraft, type of CNI at baseline, proportion of CNI levels over therapeutic threshold within first month post-transplant, and transplant era.

**SA-7. Correlation Plots Between Pre-Transplant Serum Magnesium and Serum Magnesium at One-Month Post-Transplant**

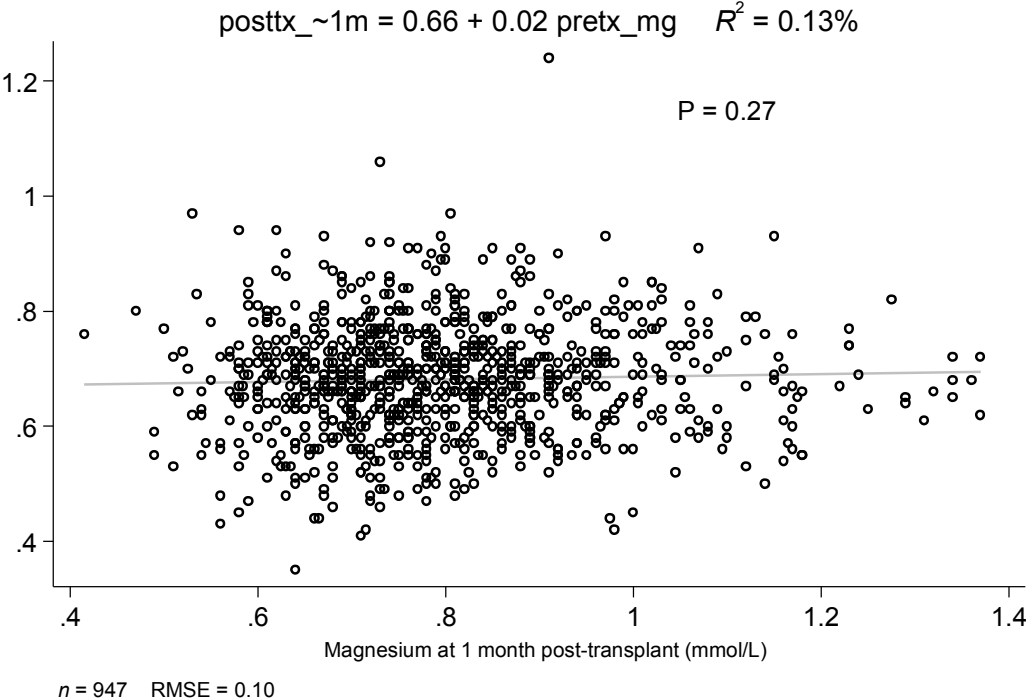

**SA-8. Cox Proportional Hazards Models for the Association Between Pre-Transplant Serum Magnesium and the Risk of New-Onset Diabetes Mellitus After Kidney Transplantation**

| Exposure variables                                    | Origin: at transplant |                | Origin: one-month post-transplant |                |
|-------------------------------------------------------|-----------------------|----------------|-----------------------------------|----------------|
|                                                       | HR (95% C.I.)         | <i>P</i> value | HR (95% C.I.)                     | <i>P</i> value |
| Pre-transplant magnesium<br>(per 0.1 mmol/L decrease) | 0.99 (0.90, 1.09)     | 0.83           | 0.99 (0.90, 1.10)                 | 0.910          |
| Hypomagnesemia<br>(Yes vs. No)                        | 0.81 (0.59, 1.12)     | 0.21           | 0.83 (0.60, 1.14)                 | 0.249          |

Unit conversion for serum magnesium: 1 mmol/L = 2.43 mg/dL

Models were adjusted for post-transplant serum magnesium, recipient age, sex, race, body mass index, peak PRA, time on dialysis, eGFR, pre-transplant hypomagnesemia, cause of end-stage renal disease, donor age, sex, history of hypertension, body mass index, donor type, delayed graft function, regraft, type of CNI at baseline, and transplant era



### **SA-9. Immunosuppression and Patient Follow-Up Protocols at the Toronto General Hospital Kidney Transplant Program During the Study Period**

During the study period, all kidney transplant recipients at the Toronto General Hospital received either depleting or non-depleting induction therapy. Maintenance immunosuppression included a calcineurin inhibitor, mycophenolate mofetil, and prednisone. Prior to 2007, the first-line calcineurin inhibitor was cyclosporine microemulsion with C2 level monitoring. Subsequently, tacrolimus with trough level monitoring became the first-line calcineurin inhibitor. After hospital discharge, routine outpatient blood work (including blood glucose and serum magnesium) was performed three times per week for 4 weeks, two times per week for 4 weeks, weekly for 8 weeks, biweekly from months 3 to 6, monthly from months 7 to 12, and then every 2 to 3 months beyond 12 months. Additionally, patients were followed at the Toronto General Hospital Kidney Transplant Clinic weekly for 1 month, biweekly for 2 months, monthly from months 4 to 6, bimonthly from months 7 to 12, every 3 to 4 months from 13 to 24 months, and then every 6 to 12 months beyond 24 months.

### **SA-10. Data Sources for the Study**

Data for this study were retrieved from our in-center research database, the Comprehensive Renal Transplant Research Information System (CoReTRIS), which houses an extensive set of recipient, donor, transplant, laboratory, pathology, treatment, and follow-up data on all patients receiving kidney transplants at the Toronto General Hospital since 1 Jan 2000<sup>44</sup>. All data housed in CoReTRIS have been abstracted from patient charts (electronic and paper), entered into the database, and audited for completeness and accuracy.
